# Supplementary material for: High-Tp-triggered phase transition exhibiting switchable dielectric–thermal responses and long photoluminescence lifetime in a novel inclusion luminophor
Source: Royal Society of Chemistry journal article supplement (doi:10.1039/d2ce00236a), 2022-01-01
Supplement: d2ce00236a1.pdf [file d2ce00236a1.pdf]

## Electronic Supplementary Information (ESI)

# High- $T_p$ -Triggered Phase Transition Exhibiting Switchable Dielectric-Thermal Responses and Long Photoluminescence Lifetime in a Novel Inclusion Luminophor

Ding-Chong Han, Yu-Hui Tan,\* Jia-Hui Wen, Yun-Zhi Tang,\* Peng-Fei Wu, Yu-Kong Li, Ming-Yang Wan and Xiao-Wei Fan

Faculty of Materials Metallurgy and Chemistry, Jiangxi University of Science and Technology, Ganzhou 341000, Jiangxi Province, P.R. China

Corresponding Author's E-mail: tyxcn@163.com (Y.-H. Tan); tangyunzhi75@163.com (Y.-Z. Tang)

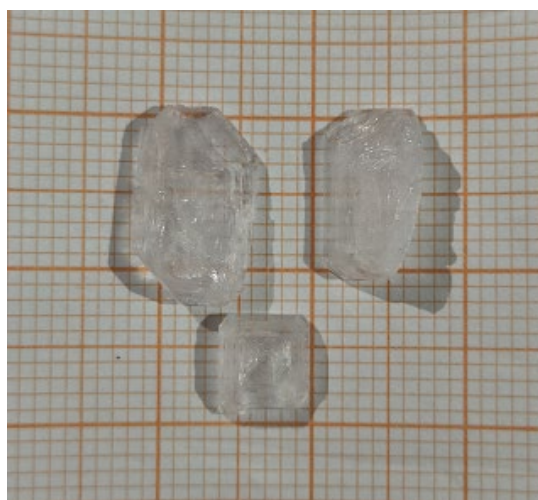

Fig. S1. The single crystals of **1**.

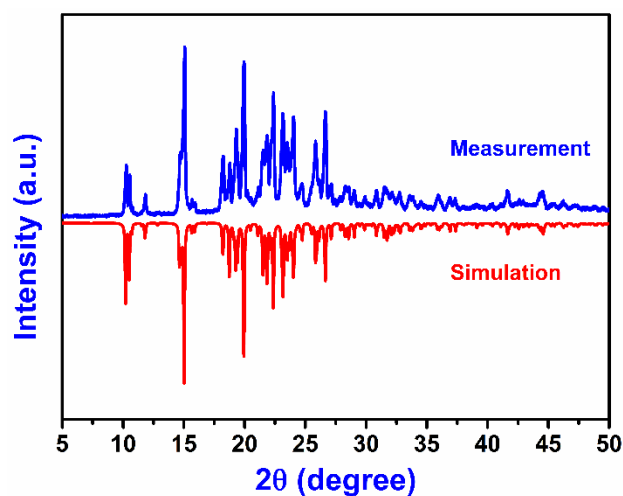

Fig. S2. PXRD (powder X-ray diffraction) measurement comparison with single crystal simulation of **1** at room temperature.

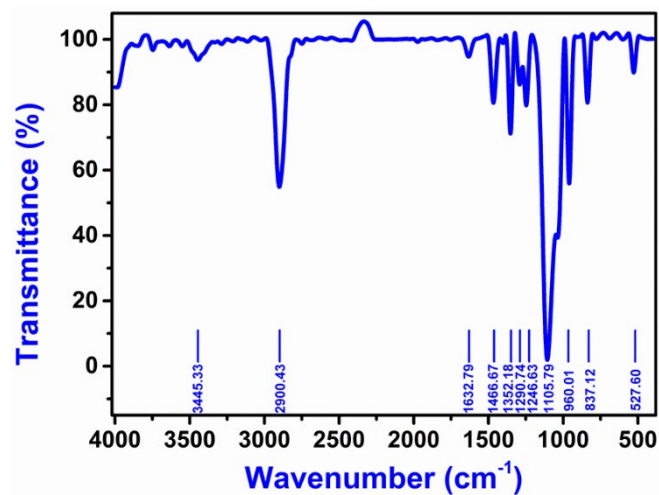

Fig. S3. The infrared (IR) spectra of **1** at room temperature.

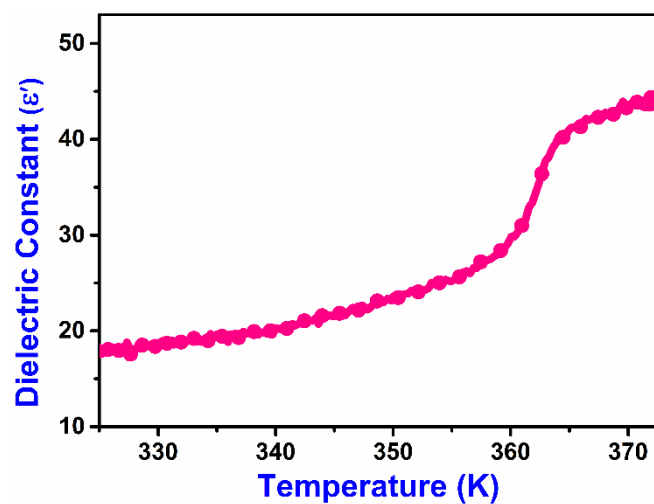

Fig. S4. The temperature-dependence of dielectric constant ( $\epsilon'$ ) at the frequency of 100 kHz of **1**.

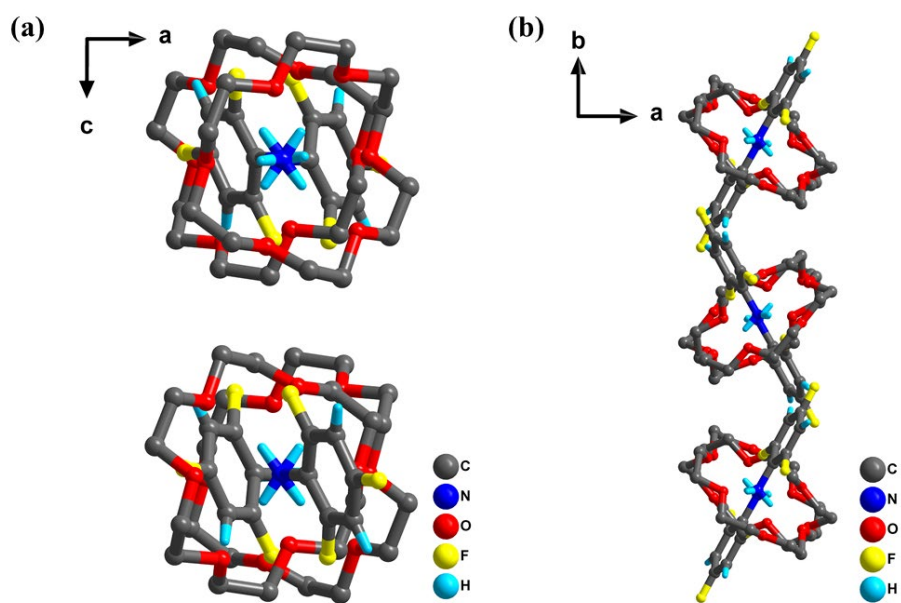

Fig. S5. The packing of supramolecular cations viewed along *b*-axis (a) and *c*-axis (b) of **1**, respectively.

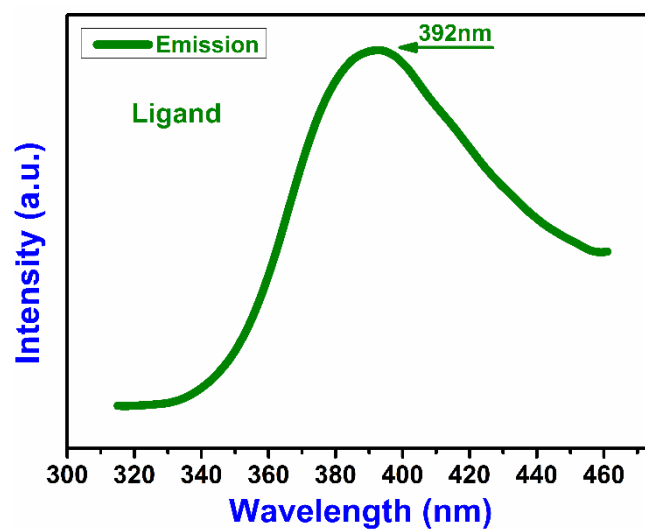

Fig. S6. The room-temperature photoluminescence (PL) spectrum of the ligand (2,4,6-trifluoroaniline).

|                 |                                                        |              |                |
|-----------------|--------------------------------------------------------|--------------|----------------|
| Model           | ExpDec2                                                |              |                |
| Equation        | $y = A1 \cdot \exp(-x/t1) + A2 \cdot \exp(-x/t2) + y0$ |              |                |
| Reduced Chi-Sqr | 6.09488E8                                              |              |                |
| Adj. R-Square   | 0.93762                                                |              |                |
|                 |                                                        | Value        | Standard Error |
| S1              | y0                                                     | 75815.95284  | 2762.30836     |
|                 | A1                                                     | 336143.23106 | 18045.72693    |
|                 | t1                                                     | 0.28378      | 0.01984        |
|                 | A2                                                     | 6.36353E7    | 2.90989E7      |
|                 | t2                                                     | 0.01084      | 0.00107        |
|                 | k1                                                     | 3.52384      | 0.2464         |
|                 | k2                                                     | 92.25289     | 9.06822        |
|                 | tau 1                                                  | 0.1967       | 0.01375        |
| tau 2           | 0.00751                                                | 7.38563E-4   |                |

Fig. S7. The related parameters of fluorescence lifetime of **1**.

**Table S1.** The crystallographic data and structure refinements for **1** at room temperature.

| [(2,4,6-trifluoroanilinium)-(18-crown-6)][BF <sub>4</sub> ] |                                    |                                                         |                                    |
|-------------------------------------------------------------|------------------------------------|---------------------------------------------------------|------------------------------------|
| 294 K                                                       |                                    |                                                         |                                    |
| Formula weight                                              | 499.23                             | Z                                                       | 4                                  |
| Crystal system                                              | Monoclinic                         | Density (g/cm <sup>3</sup> )                            | 1.377                              |
| Space group                                                 | <i>P</i> 2 <sub>1</sub> / <i>c</i> | m (mm <sup>-1</sup> )                                   | 0.134                              |
| <i>a</i> (Å)                                                | 8.4188(4)                          | F (000)                                                 | 1040.0                             |
| <i>b</i> (Å)                                                | 16.5033(8)                         | Data/restraints/parameters                              | 5488/58/336                        |
| <i>c</i> (Å)                                                | 17.3275(8)                         | GOF                                                     | 1.019                              |
| $\alpha$ (°)                                                | 90                                 | $R_1, wR_2 [I \geq 2\sigma(I)]$                         | $R_1 = 0.0730,$<br>$wR_2 = 0.1699$ |
| $\beta$ (°)                                                 | 90.263(2)                          | $R_1, wR_2$ (all data)                                  | $R_1 = 0.1244,$<br>$wR_2 = 0.2053$ |
| $\gamma$ (°)                                                | 90                                 | $\Delta\rho_{max}/\Delta\rho_{min}$ (eÅ <sup>-3</sup> ) | 0.50/-0.36                         |
| <i>V</i> (Å <sup>3</sup> )                                  | 2407.4(2)                          | CCDC                                                    | 2130929                            |

**Table S2.** Intermolecular hydrogen bond lengths (Å) and angles (degrees) for **1**.

| D-H...A     | D-H  | H...A | D...A    | $\angle$ D-H...A |
|-------------|------|-------|----------|------------------|
| N1-H1C...O3 | 0.89 | 1.97  | 2.861(3) | 174              |
| N1-H1D...O1 | 0.89 | 2.02  | 2.884(3) | 164              |
| N1-H1E...O5 | 0.89 | 1.94  | 2.815(3) | 169              |

## Calculation of $\Delta S$ and $N$

### In the heating cycle mode

$$\Delta S_1 = R \ln N_1$$

$$\Delta S_1 = \int_{T_2}^{T_1} \frac{Q}{T} dT$$

$$\approx \frac{\Delta H}{T_c}$$

$$= \frac{11.82 \text{ g}^{-1} \text{ J} \times 499.23 \text{ mol}^{-1} \text{ g}}{364 \text{ K}}$$

$$= 16.21 \text{ J} \cdot \text{mol}^{-1} \cdot \text{K}^{-1}$$

$$N_1 = \exp\left(\frac{\Delta S_1}{R}\right) = \exp\left(\frac{16.21 \text{ J} \cdot \text{mol}^{-1} \cdot \text{K}^{-1}}{8.314 \text{ J} \cdot \text{mol}^{-1} \cdot \text{K}^{-1}}\right)$$

$$= 7.03$$

### In the cooling cycle mode

$$\Delta S_2 = R \ln N_2$$

$$\Delta S_2 = \int_{T_2}^{T_1} \frac{Q}{T} dT$$

$$\approx \frac{\Delta H}{T_c}$$

$$= \frac{9.30 \text{ g}^{-1} \text{ J} \times 499.23 \text{ mol}^{-1} \text{ g}}{361 \text{ K}}$$

$$= 12.86 \text{ J} \cdot \text{mol}^{-1} \cdot \text{K}^{-1}$$

$$N_2 = \exp\left(\frac{\Delta S_2}{R}\right) = \exp\left(\frac{12.86 \text{ J} \cdot \text{mol}^{-1} \cdot \text{K}^{-1}}{8.314 \text{ J} \cdot \text{mol}^{-1} \cdot \text{K}^{-1}}\right)$$

$$= 4.70$$
